# Supplementary material for: Iloprost and Organ Dysfunction in Adults With Septic Shock and Endotheliopathy: A Randomized Clinical Trial
Source: PubMed Central journal article supplement (PMC11391323; doi:10.1001/jamanetworkopen.2024.32444), 2024-09-11
Supplement: jamanetwopen-e2432444-s003.pdf [file jamanetwopen-e2432444-s003.pdf]

## Data Sharing Statement

Bestle. Iloprost and Organ Dysfunction in Adults With Septic Shock and Endotheliopathy.  
*JAMA Netw Open*. Published September 11, 2024. doi:10.1001/jamanetworkopen.2024.32444

### Data

**Data available:** Yes

**Data types:** Deidentified participant data

**How to access data:** [kristine.holst.pedersen.01@regionh.dk](mailto:kristine.holst.pedersen.01@regionh.dk)

**When available:** With publication

### Supporting Documents

**Document types:** Statistical/analytic code, Informed consent form

**How to access documents:** [Jakob.Stensballe@regionh.dk](mailto:Jakob.Stensballe@regionh.dk)

**When available:** With publication

### Additional Information

**Who can access the data:** Researchers whose proposed use of the data has been approved

**Types of analyses:** Any purpose

**Mechanisms of data availability:** Approval of a proposal
